# Supplementary material for: Regulation of plant phototropic growth by NPH3/RPT2-like substrate phosphorylation and 14-3-3 binding
Source: PubMed Central journal article supplement (PMC8531357; doi:10.1038/s41467-021-26333-5), 2021-10-21
Supplement: 41467_2021_26333_MOESM3_ESM.pdf [file 41467_2021_26333_MOESM3_ESM.pdf]

## Description of Additional Supplementary Files

**File name: Supplementary Data 1**

Description: Proteins identified by liquid chromatography–tandem mass spectrometry of anti-GFP immunoprecipitations.

**File name: Supplementary Data 2**

Description: Identification of putative light-dependent NPH3-interacting proteins.
